# Supplementary material
Source: Springer Nature journal article supplement (https://www.springermedizin.de/resource/supplementary/13045_2011_182_MOESM4_ESM.pdf/9660828)

# Pmel-1 Foxp3<sup>EGFP</sup>

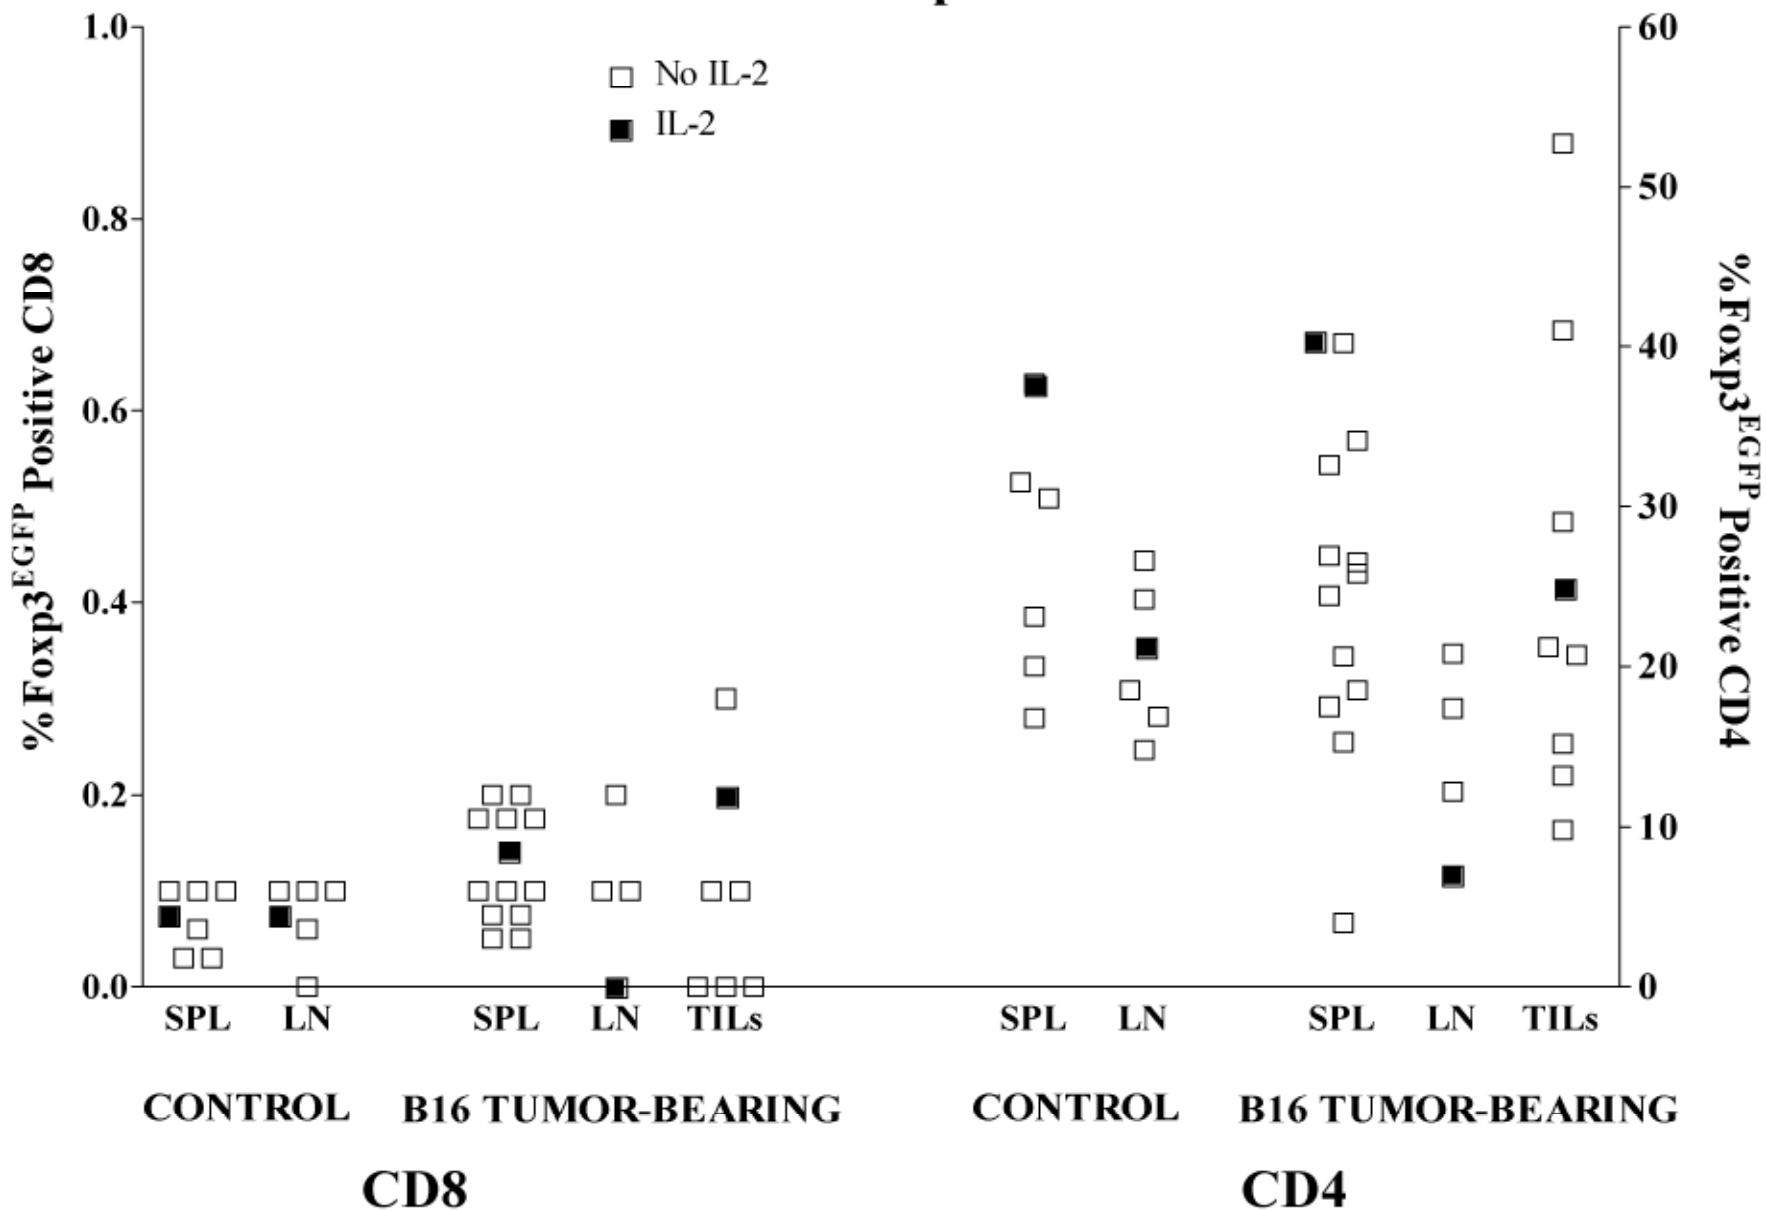

Supplement: MOESM4 [file 9660828]
